# Supplementary material for: Assembling 1D magnetic chain based on octacyanotungstate(v) and [Cu2L2Ln] sub-building units (Ln = Eu, Gd, Tb and Dy)
Source: Royal Society of Chemistry journal article supplement (doi:10.1039/c3dt50173f), 2013-01-01
Supplement: c3dt50173f.pdf [file c3dt50173f.pdf]

## Electronic Supplementary Information

### Assembling 1D magnetic chain based on Octacyanotungstate (V) and [Cu<sub>2</sub>L<sub>2</sub>Ln] sub-building units (Ln = Eu, Gd, Tb and Dy)

Xiao-Jiao Song,<sup>a</sup> Zai-Chao Zhang,<sup>b</sup> Yong-Lu Xu,<sup>a</sup> Jun Wang,<sup>a</sup> Hong-Bo Zhou,<sup>a</sup> You Song<sup>\*a</sup>

**Table S1.** Results of the Continuous Shape Measure Analysis geometry<sup>a</sup>

| Geometry | SAPR-8 | BTP-8 | DD-8 |
|----------|--------|-------|------|
| <b>1</b> | 0.55   | 1.53  | 1.69 |
| <b>2</b> | 0.56   | 1.50  | 1.68 |
| <b>3</b> | 0.57   | 1.47  | 1.76 |
| <b>4</b> | 0.58   | 1.51  | 1.62 |

<sup>a</sup>SAPR-8 is the shape measure relative to the square antiprism; BTP-8 is the shape measure relative to the bicapped trigonal prism; DD-8 is the shape measure relative to the dodecahedron.

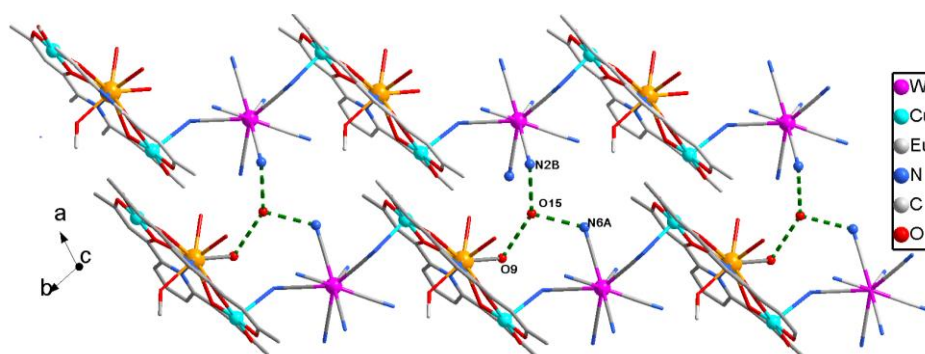

**Fig. S1** A view of the interchain linking in **1** via hydrogen bonds, H atoms and other solvents in crystal lattice have been omitted for the clarity. Symmetry code: A = -1+x, -1+y, z; x, -1+y, z.

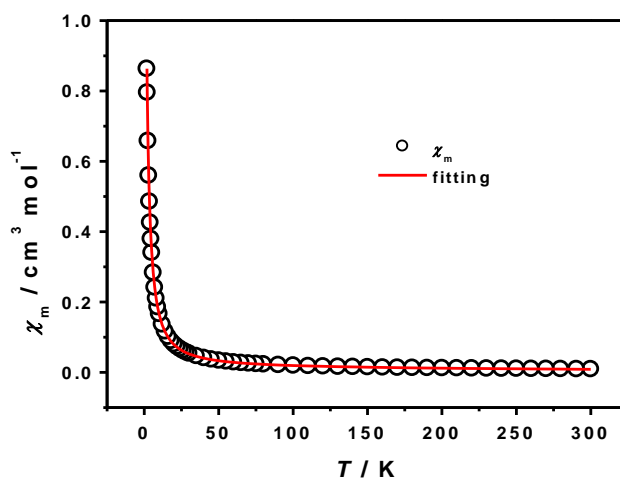

**Fig. S2** Temperature dependence of susceptibility of complex **1** in the field of 100 Oe.

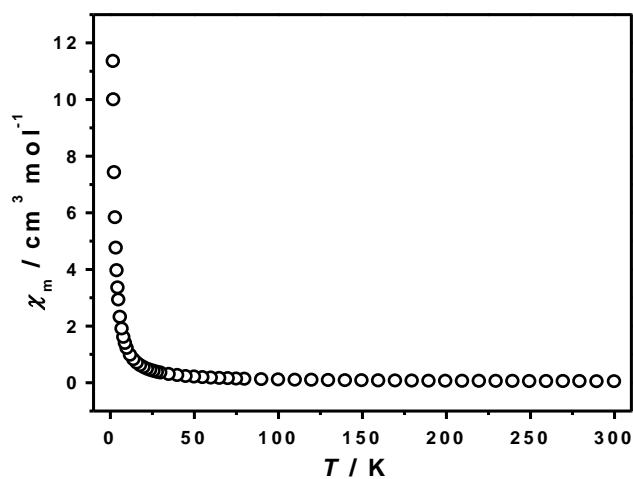

**Fig. S3** Temperature dependence of susceptibility of complex **2** in the field of 100 Oe.

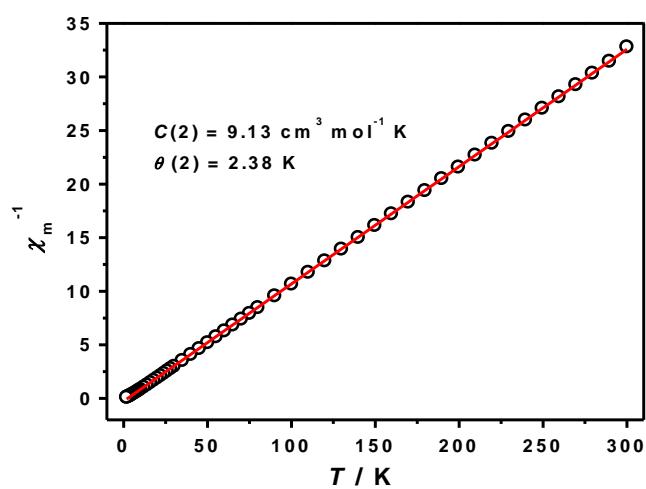

**Fig. S4** Temperature dependence of the reciprocal of susceptibility of complex **2**. The red line is the fitting result by Curie-Weiss law.

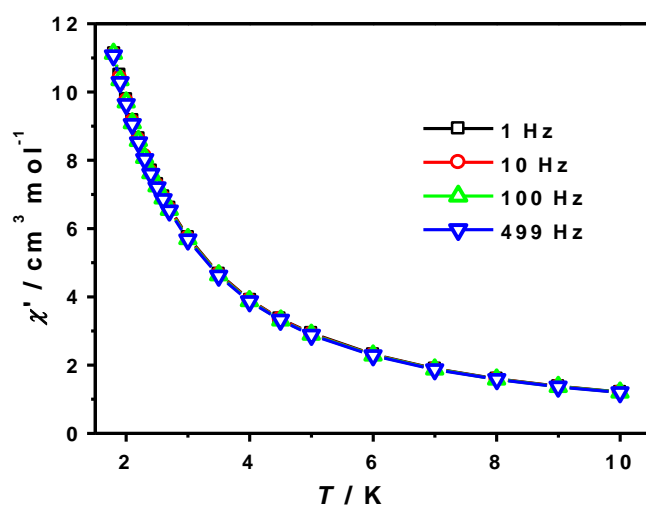

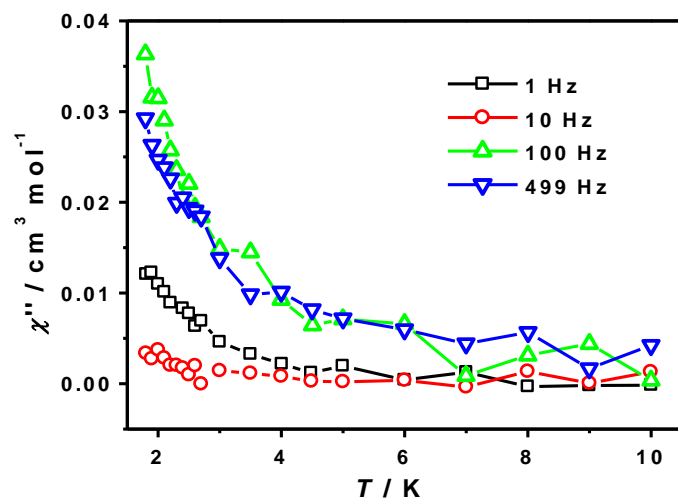

**Fig. S5** Temperature dependence of the AC in-phase,  $\chi'$  (top), and out-of phase,  $\chi''$  (bottom), components of the ac susceptibility of complex **2**,  $H_{dc}=0$ ,  $H_{ac}=30\text{Oe}$ .

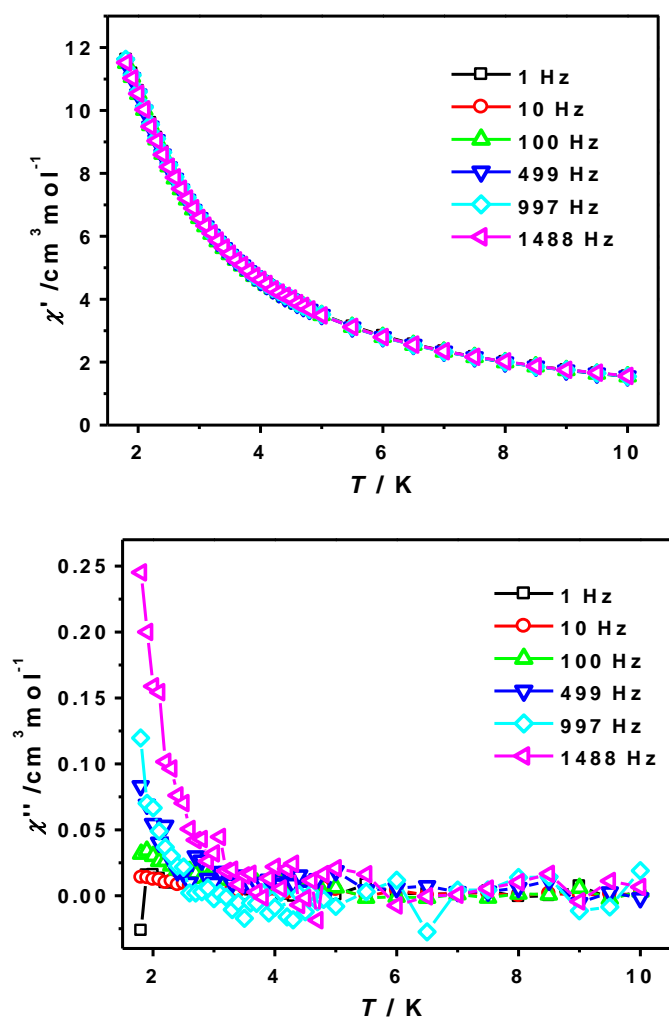

**Fig. S6** Temperature dependence of in-phase,  $\chi'$  (top), and out-of phase,  $\chi''$  (bottom), components of the ac susceptibility of complex **3**,  $H_{dc}=0$ ,  $H_{ac}=30\text{Oe}$ .

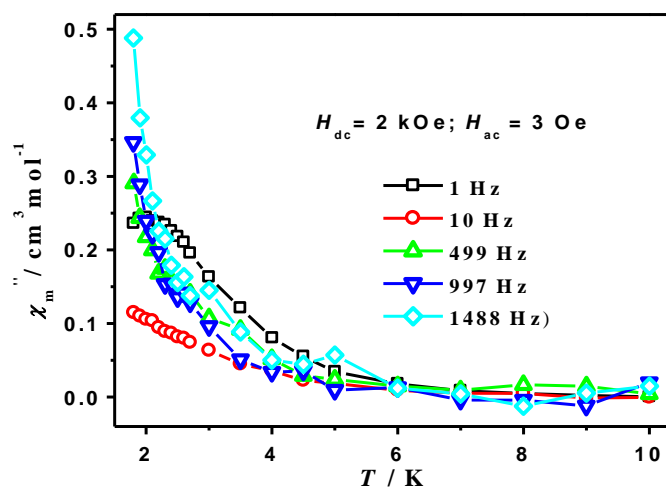

**Fig. S7** Temperature dependence of the out-of phase ac susceptibility of complex 3,  $H_{dc} = 2 \text{ kOe}$ ,  $H_{ac} = 3 \text{ Oe}$ .

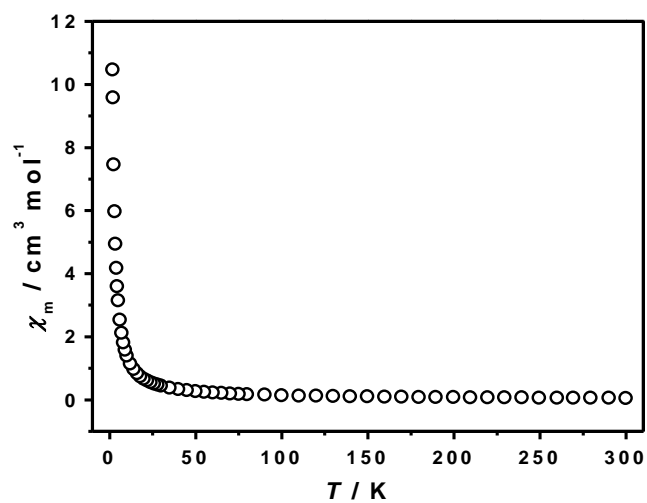

**Fig. S8** Temperature dependence of susceptibility of complex 3 in the field of 100 Oe.

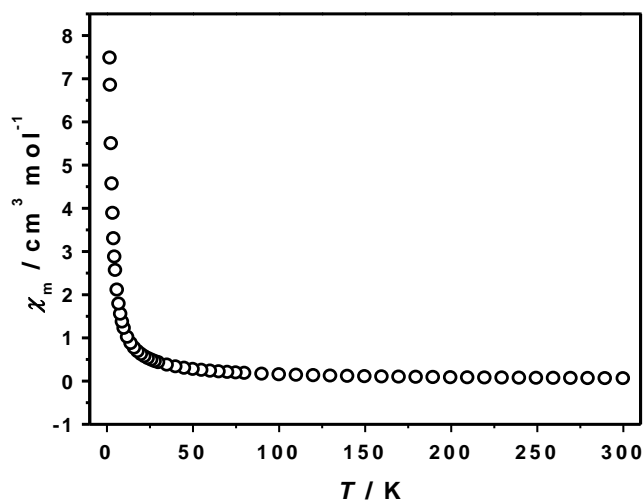

**Fig. S9** Temperature dependence of susceptibility of complex 4 in the field of 100 Oe.

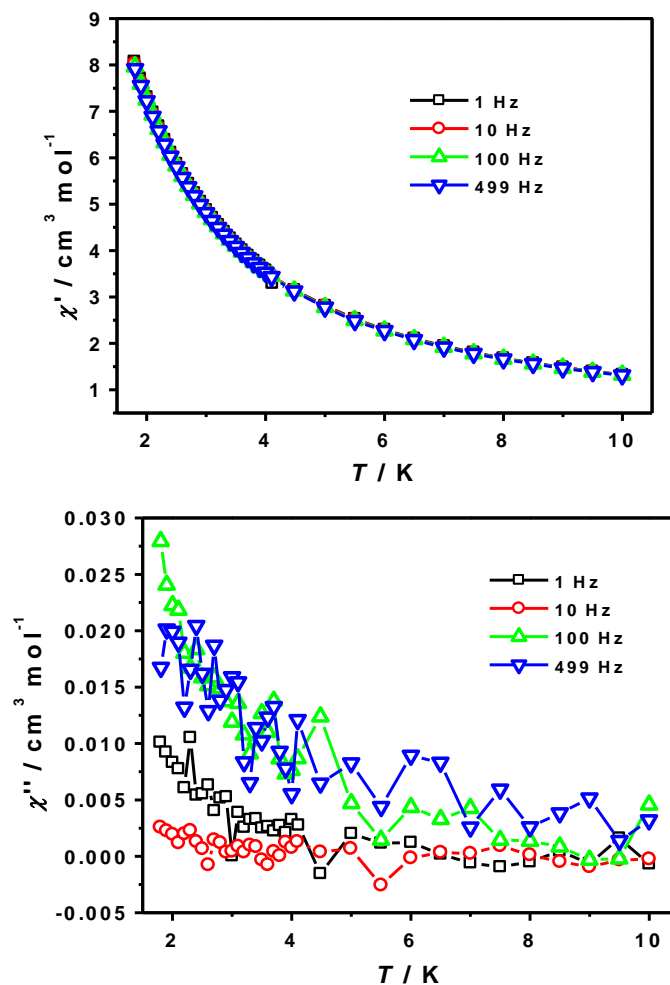

**Fig. S10** Temperature dependence of in-phase,  $\chi'$  (top), and out-of phase,  $\chi''$  (bottom), components of the ac susceptibility of complex **4**,  $H_{\text{dc}}=0$ ,  $H_{\text{ac}}=3\text{Oe}$ .

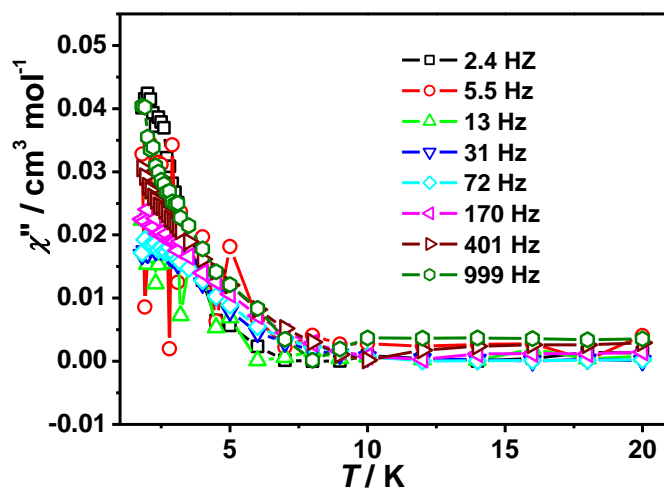

**Fig. S11** Temperature dependence of the out-of phase ac susceptibility of complex **4**,  $H_{\text{dc}}=2\text{kOe}$ ,  $H_{\text{ac}}=3\text{Oe}$ .
